# Supplementary material for: Accurate classification of carotid endarterectomy indication using physician claims and hospital discharge data
Source: Springer Nature journal article supplement (doi:10.1186/s12913-022-07614-1), 2022-03-22
Supplement: MOESM1 [file 20243996]

# Accurate classification of carotid endarterectomy indication using physician claims and hospital discharge data – Data Supplement

## LIST OF R PACKAGES

### **R version 3.6.1 (2019-07-05)**

**Platform:** x86\_64-w64-mingw32/x64 (64-bit), Windows 10 x64 (build 18362)

**Base:** stats, graphics, grDevices, utils, datasets, methods, base

**Attached:** furrr\_0.2.1, future\_1.19.1, pROC\_1.17.0.1, icd.data\_1.0, rules\_0.0.2, yardstick\_0.0.7, workflows\_0.2.0, tune\_0.1.1, rsample\_0.0.7, recipes\_0.1.13, parsnip\_0.1.3, modeldata\_0.0.2, infer\_0.5.3, dials\_0.0.9, scales\_1.1.1, broom\_0.7.0, tidymodels\_0.1.1, forcats\_0.5.1, stringr\_1.4.0, dplyr\_1.0.4, purrr\_0.3.4, readr\_1.4.0, tidyr\_1.1.2, tibble\_3.0.6, ggplot2\_3.3.3, tidyverse\_1.3.0, magrittr\_2.0.1, here\_0.1

**Loaded via namespace:** via namespace: colorspace\_2.0-0, ellipsis\_0.3.1, class\_7.3-15, rprojroot\_2.0.2, fs\_1.5.0, rstudioapi\_0.13, listenv\_0.8.0, farver\_2.0.3, proclim\_2018.04.18, lubridate\_1.7.9.2, ranger\_0.12.1, xml2\_1.3.2, codetools\_0.2-16, splines\_3.6.1, knitr\_1.30, jsonlite\_1.7.2, caret\_6.0-86, BlandAltmanLeh\_0.3.1, dbplyr\_1.4.2, compiler\_3.6.1, httr\_1.4.2, backports\_1.2.0, assertthat\_0.2.1, Matrix\_1.2-17, cli\_2.3.0, htmltools\_0.5.1.1, tools\_3.6.1, gtable\_0.3.0, glue\_1.4.2, reshape2\_1.4.3, Rcpp\_1.0.6, cellranger\_1.1.0, DiceDesign\_1.8-1, vctrs\_0.3.6, nlme\_3.1-140, iterators\_1.0.10, timeDate\_3043.102, gower\_0.2.1, xfun\_0.20, globals\_0.13.1, rvest\_0.3.5, lifecycle\_0.2.0, MASS\_7.3-53, ipred\_0.9-9, hms\_1.0.0, parallel\_3.6.1, yaml\_2.2.1, rpart\_4.1-15, stringi\_1.5.3, highr\_0.8, foreach\_1.4.4, lhs\_1.0.1, hardhat\_0.1.4, shape\_1.4.4, lava\_1.6.5, epiR\_1.0-2, rlang\_0.4.10, pkgconfig\_2.0.3, evaluate\_0.14, lattice\_0.20-38, labeling\_0.4.2, tidyselect\_1.1.0, plyr\_1.8.4, R6\_2.5.0, generics\_0.1.0, DBI\_1.1.0, pillar\_1.4.7, haven\_2.2.0, withr\_2.4.1, mgcv\_1.8-28, survival\_3.2-7, nnet\_7.3-12, modelr\_0.1.5, crayon\_1.4.1, rmarkdown\_2.5, grid\_3.6.1, readxl\_1.3.1, data.table\_1.13.6, ModelMetrics\_1.2.2.2, reprex\_0.3.0, digest\_0.6.27, stats4\_3.6.1, glmnet\_4.1, GPfit\_1.0-8, munsell\_0.5.0, viridisLite\_0.3.0, BiasedUrn\_1.07

## LITERATURE REVIEW

### Search strategy

Last executed: 2020-09-19

1. Endarterectomy, Carotid/
2. Time-to-Treatment/
3. limit 2 to (abstracts and English language and yr="2013 -Current")
4. 1 and 3
5. Time Factors/
6. limit 5 to (abstracts and English language and yr="2000 - 2013")
7. 1 and 6
8. Time Factors/
9. limit 8 to (abstracts and English language and yr="2013 -Current")
10. 1 and 9
11. 4 or 7 or 10
12. Quality Improvement/
13. Endarterectomy, Carotid/sn [Statistics & Numerical Data]
14. 1 and 12
15. 11 or 13 or 14
16. limit 15 to yr="2000 -Current"
17. limit 16 to (abstracts and English language)
18. from 11 keep 6,8
19. from 17 keep 7,37-38,52,60,65,107,109-110,118
20. from 17 keep 159,173,188-189,215,235,299,312,345,348,353,365,376,381
21. from 17 keep 421,440,450
22. from 17 keep 478,490,506,516,520,531-532,540,567-568
23. from 17 keep 630,648,651,725,741,839,872
24. 18 or 19 or 20 or 21 or 22 or 23
25. delay\*.mp.

26. 1 and 25

27. 26 not 17

28. from 27 keep 34,42,50,67

29. administr\*.mp.

30. (1 and 29) not 17

31. limit 30 to (abstracts and english language and yr="2004 -Current")

32. symptom\*.mp. [mp=title, abstract, original title, name of substance word, subject heading word, keyword heading word, protocol supplementary concept word, rare disease supplementary concept word, unique identifier, synonyms]

33. day\*.mp. [mp=title, abstract, original title, name of substance word, subject heading word, keyword heading word, protocol supplementary concept word, rare disease supplementary concept word, unique identifier, synonyms]

34. week\*.mp. [mp=title, abstract, original title, name of substance word, subject heading word, keyword heading word, protocol supplementary concept word, rare disease supplementary concept word, unique identifier, synonyms]

35. (1 and 32 and (33 or 34)) not (17 or 31 or 27)

36. limit 35 to (abstracts and english language and yr="2004 -Current")

37. from 31 keep 9,11,16,24,29

38. from 36 keep 5,60,75,81,85,109

39. from 37 keep 1-2,4-5

40. from 36 keep 152

41. 28 or 37 or 38 or 39 or 40 or 24

## Literature summary

Supplementary Table 1. Summary of administrative data (A) and registry (R) studies of carotid artery revascularization including surgical indication.

| #  | A/R | Data source                                                                          | Symptomatic status                                                                          |                                                                                                              |            |
|----|-----|--------------------------------------------------------------------------------------|---------------------------------------------------------------------------------------------|--------------------------------------------------------------------------------------------------------------|------------|
|    |     |                                                                                      | Approach                                                                                    | Validation                                                                                                   | Prevalence |
| 7  | A   | Hospital database (Johns Hopkins) for method, state database (Maryland) for analysis | Not stated                                                                                  |                                                                                                              |            |
| 8  | A   | State database (Maryland)                                                            | ICD-9-CM 342, 438, 435, 781.4, 362.34, 368.12 as 'reason for surgery' (unclear where coded) | Attributes review of Charlson comorbidity index <sup>45</sup>                                                | 17.9%      |
| 9  | A   | State databases (Maryland, California)                                               | Same approach as <sup>8</sup>                                                               | States validated against Johns Hopkins cohort, but no statistics reported; see letter to editor and response | 15.2%      |
| 10 | A   | Nationwide Inpatient Sample (2005)                                                   | Procedural diagnosis 433.11 or secondary diagnosis of stroke / TIA (codes not specified)    | Not stated                                                                                                   | 7.9%       |
| 11 | A   | State databases (New York, California)                                               | ICD-9-CM 362.3, 362.84, 433.11, 433.31, 434.11, 434.91, 435.8, 435.9, 434.01                | Development using hospital database, but Not stated set and no statistics reported                           | 11.0%      |

| #             | A/R | Data source                                            | Symptomatic status                                                                                                                                                                                                                                                                                                   |                                                                                           |                                              |
|---------------|-----|--------------------------------------------------------|----------------------------------------------------------------------------------------------------------------------------------------------------------------------------------------------------------------------------------------------------------------------------------------------------------------------|-------------------------------------------------------------------------------------------|----------------------------------------------|
|               |     |                                                        | Approach                                                                                                                                                                                                                                                                                                             | Validation                                                                                | Prevalence                                   |
| <sup>12</sup> | A   | Nationwide Inpatient Sample                            | ICD-9-CM 433.11 or secondary diagnosis of stroke, TIA (codes not specified)                                                                                                                                                                                                                                          | Not stated, cites coding manual                                                           | 8.2%                                         |
| <sup>13</sup> | A   | Nationwide Inpatient Sample (2005-2008)                | Same approach as <sup>10</sup>                                                                                                                                                                                                                                                                                       | Not stated                                                                                | 5%                                           |
| <sup>14</sup> | A   | CMS Provider Analysis Review & Denominator (2003-2006) | Primary diagnosis 433.11 or secondary diagnosis (ICD-9 codes 342:34200 to 34202, 3421, 34210, 34211, 34212, 34280 to 34282, 34290 to 34292, or 438: 4380, 43810 to 43812, 43819 to 43822, 43830 to 43832, 43840 to 43842, 43850 to 43853, 4386, 4387 43881 to 43885, 43889, 4389), 435 or 781.4, or 362.34 or 368.12 | Not stated. Cites <sup>9</sup> but method is considerably different                       | 12.5%                                        |
| <sup>15</sup> | A   | Nationwide Inpatient Sample (2005-2009)                | Same approach as <sup>10</sup>                                                                                                                                                                                                                                                                                       | Not stated. Cites <sup>16</sup> , but this is a study of stroke/TIA not revascularization | Not reported (used as covariate in analysis) |

| #  | A/R | Data source                                                            | Symptomatic status                                                                                                                            |                                                                           |                                       |
|----|-----|------------------------------------------------------------------------|-----------------------------------------------------------------------------------------------------------------------------------------------|---------------------------------------------------------------------------|---------------------------------------|
|    |     |                                                                        | Approach                                                                                                                                      | Validation                                                                | Prevalence                            |
| 17 | A   | State databases (California 2005-2008, New York 2008, New Jersey 2008) | Three methods: (A) Unspecified diagnosis codes for stroke, TIA, amaurosis fugax, (B) A without stroke, (POA) A with stroke with POA indicator | Not stated. Agreement between methods reported, but no gold standard.     | (A) 15.9%, (B) 7.1%, (POA) 15.4%      |
| 18 | A   | CMS Medicare Provider Analysis and Review (2005-2009)                  | ICD-9-CM 362.34, 435.X, 781.4 in any diagnosis position                                                                                       | Not stated                                                                | 2.7%                                  |
| 19 | A   | Medicare fee-for-service claims (2009-2011)                            | 362.3[0-7], 362.84, 433.11, 433.31, 434.01, 434.91, 435.[0-3,8,9], and 781.4 [2,4,5]                                                          | Not stated (reports 'previously reported in literature' but no citations) | 10%                                   |
| 20 | A   | Nationwide Inpatient Sample (2005-2011)                                | Asymptomatic if diagnosis code 433.10, 433.30; symptomatic if 433.11, 433.31 (unclear how -/- cases handled)                                  | Not stated                                                                | 7.1-9% by year of study               |
| 21 | A   | Nationwide Inpatient Sample (2005-2009)                                | Same approach as <sup>10</sup>                                                                                                                | Not stated                                                                | 6%                                    |
| 22 | A   | Nationwide Inpatient Sample (2005-2006)                                | Same approach as <sup>10</sup>                                                                                                                | Not stated                                                                | Not reported (covariate for modeling) |

| #  | A/R | Data source                                                                                          | Symptomatic status                                                                                                           |                                                                                                                                                              |                                                      |
|----|-----|------------------------------------------------------------------------------------------------------|------------------------------------------------------------------------------------------------------------------------------|--------------------------------------------------------------------------------------------------------------------------------------------------------------|------------------------------------------------------|
|    |     |                                                                                                      | Approach                                                                                                                     | Validation                                                                                                                                                   | Prevalence                                           |
| 24 | A   | CMS Medicare Denominator (1999-2014)                                                                 | 433.11, 433.31, 434.01, 434.11, or 434.91; or secondary diagnosis 342.xx, 438.xx, 435.x, 781.4, 362.34 or 368.12             | Reports reference for <sup>14</sup> but method includes 434.X1 codes that were not in that study                                                             | 12.5%                                                |
| 25 | A   | Healthcare Cost and Utilization database (2005-2013)                                                 | Hospitalization for ischemic stroke < 90 d 433.X1, 434.X1, 436 without V57, 430.X, 431.X, 800-804, 850-854                   | Reports reference, but not applicable                                                                                                                        | N/A                                                  |
| 26 | A   | Nationwide Inpatient Sample (2005-2011)                                                              | Same method as <sup>10</sup>                                                                                                 | Not stated                                                                                                                                                   | 4.8%                                                 |
| 27 | A   | Nationwide Readmissions Database (2010-2015)                                                         | Extensive set of 5-digit ICD-9 codes encompassing ischemic diagnoses and symptoms                                            | Not stated                                                                                                                                                   | 21.0% CEA<br>30.1% CAS                               |
| 28 | R   | National Surgical Quality Improvement Program (2007-2008)                                            | Reported history of stroke or TIA                                                                                            | Not stated                                                                                                                                                   | 43.5%                                                |
| 6  | A/R | National Surgical Quality Improvement Program and hospital administrative discharge data (2005-2011) | ICD-9-CM 435.X, 781.4, V12.54, 362.3X, 368.12, 433.11, 433.31, 433.91, 434.01, 434.11, 434.91; NSQIP history of stroke / TIA | Physician chart review vs. discharge abstracts (n=1342) sensitivity 36.6, specificity 93.1, PPV 73.2, NPV 74; vs. NSQIP (n=392) sensitivity 91.6%, PPV 63.0% | 17% administrative data, 34% chart review, 44% NSQIP |

| #  | A/R | Data source                             | Symptomatic status                                               |            |                        |
|----|-----|-----------------------------------------|------------------------------------------------------------------|------------|------------------------|
|    |     |                                         | Approach                                                         | Validation | Prevalence             |
| 29 | R   | Vascular Quality Initiative (2009-2015) | Declared history of ipsilateral stroke, TIA, or retinal ischemia | Not stated | 44% CEA<br>64% CAS     |
| 30 | R   | Vascular Quality Initiative (2003-2013) | Not stated                                                       | Not stated | 38.3% CEA<br>48.3% CAS |
| 31 | R   | Vascular Quality Initiative (2005-2017) | Declared history of ipsilateral stroke, TIA, or retinal ischemia | Not stated | 34.1% CEA<br>44.5% CAS |
| 32 | R   | Vascular Quality Initiative (2003-2017) | Not stated                                                       | Not stated | 30.7% CEA              |



## SUPPLEMENTARY TABLES

Supplementary Table 2. Candidate cluster definitions for physician claims diagnoses, with provider-type dyads

| <b>Diagnosis cluster</b>                   | <b>ICD 9 (3 digit)</b> | <b>Provider type</b>       |
|--------------------------------------------|------------------------|----------------------------|
| <b>Retinal (ophthalmology / optometry)</b> | 362 or 368             | Ophthalmology or optometry |
| <b>Retinal (neurology)</b>                 | 362 or 368             | Neurology                  |
| <b>Retinal (other)</b>                     | 362 or 368             | All others                 |
| <b>Stroke (neurology)</b>                  | 434 or 436             | Neurology                  |
| <b>Stroke (other)</b>                      | 434 or 436             | All others                 |
| <b>TIA (neurology)</b>                     | 435                    | Neurology                  |
| <b>TIA (other)</b>                         | 435                    | All others                 |
| <b>Stenosis (neurology)</b>                | 433                    | Neurology                  |
| <b>Stenosis (other)</b>                    | 433                    | All others                 |
| <b>Symptom</b>                             | 781 or 341             | All                        |

Supplementary Table 3. Candidate cluster definitions for service items, by cluster set (full, partial, and enhanced).

| <b>Service cluster</b>                 | <b>Cluster set</b> | <b>Fee codes</b>                                                                                                                                                                      |
|----------------------------------------|--------------------|---------------------------------------------------------------------------------------------------------------------------------------------------------------------------------------|
| <b>After hours visit</b>               | Full and enhanced  | 1200, 1201, 1202, 1205, 1206, 1207, 1210, 1211, 1212, 1215, 1216, 1217                                                                                                                |
| <b>Anesthesia visit</b>                | Full and enhanced  | 1080, 1164, 1165, 1169, 1172, 1173, 1174, 1175, 1176, 1177, 1178, 1179, 1180, 1181, 1192                                                                                              |
| <b>Holter</b>                          | All                | 33047, 33048, 33049, 33062, 33063, 33065, 33069, 33092                                                                                                                                |
| <b>Echocardiogram</b>                  | All                | 8679, 33091                                                                                                                                                                           |
| <b>Cardiology visit</b>                | Full and enhanced  | 33006, 33007, 33008, 33010, 33012, 33110, 33112, 33114                                                                                                                                |
| <b>Carotid CTA</b>                     | All                | 100001 (generated value based on coincidental CT head and CT body)                                                                                                                    |
| <b>Carotid ultrasound</b>              | All                | 8676                                                                                                                                                                                  |
| <b>Emergency visit</b>                 | All                | 1810, 1811, 1812, 1813, 1821, 1822, 1823, 1831, 1832, 1833, 1841, 1842, 1843, 96801, 96802, 96803, 96804, 96805, 96811, 96812, 96813, 96814, 96815, 96821, 96822, 96823, 96824, 96825 |
| <b>Internal medicine visit</b>         | Full and enhanced  | 310, 311, 312, 314, 32370, 32372, 32271                                                                                                                                               |
| <b>Head CT</b>                         | All                | 8690, 8691, 8692                                                                                                                                                                      |
| <b>Neurology visit</b>                 | All                | 406, 407, 408, 410, 411, 40410, 40411                                                                                                                                                 |
| <b>Optometry / ophthalmology visit</b> | All                | 2014 : 2049, 2899                                                                                                                                                                     |
| <b>Optometry / ophthalmology exam</b>  | All                | 2005, 2007, 2008, 2009, 2010, 2011, 2012, 22007, 22008, 22010, 22011                                                                                                                  |
| <b>Out of office visit</b>             | Enhanced           | 12200, 12201, 12210, 12220, 13200, 13201, 13210, 13220, 15200, 15201, 15210, 15220, 16200, 16201, 16210, 16220, 17220, 17201, 17210, 17220, 18200, 18201, 18210, 18220                |
| <b>Stroke visit</b>                    | All                | 441, 442, 443, 444, 40441, 40442, 40442, 40444                                                                                                                                        |

---

| <b>Service cluster</b>     | <b>Cluster set</b> | <b>Fee codes</b>                  |
|----------------------------|--------------------|-----------------------------------|
| <b>Cardiac stress test</b> | Enhanced           | 33034, 33035, 33036, 95062, 95063 |

---

Supplementary Table 4. Test set calibration statistics based on logistic recalibration

$\text{Logit}(Y) = a + b_L * L$ , where L denotes the candidate linear predictor model. The unreliability index evaluates simultaneously  $H_0: a = 0, b_L = 1$  using a 2-df chi-square test.

|                              | <b>Logistic<sub>HOSP</sub></b> | <b>Logistic<sub>DX</sub></b> | <b>Logistic<sub>ALL</sub></b> | <b>Forest<sub>ALL</sub></b> |
|------------------------------|--------------------------------|------------------------------|-------------------------------|-----------------------------|
| <b>Intercept</b>             | -0.32                          | -0.22                        | -0.25                         | -0.57                       |
| <b>Slope</b>                 | 1.36                           | 0.84                         | 0.95                          | 1.74                        |
| <b>Unreliability p-value</b> | 0.523                          | 0.348                        | 0.680                         | 0.054                       |

Supplementary figures

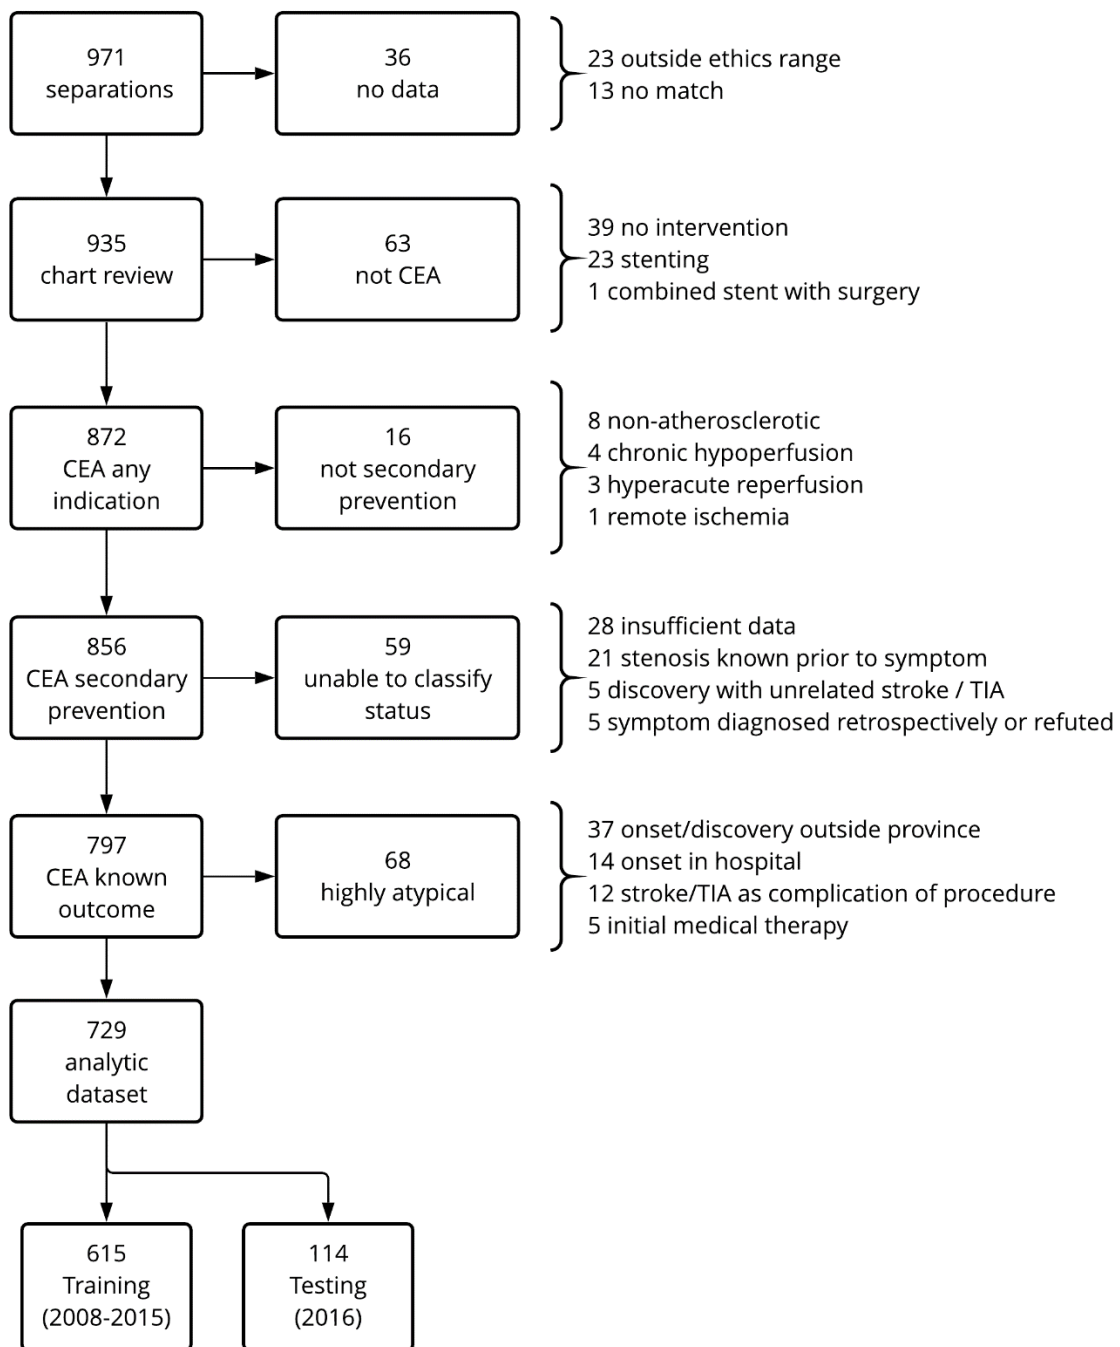

Supplementary Figure 1. Participant flow diagram, Vancouver Canada, 2008-2016.

**Feature extraction for physician claims data**

**Physician claims data set**

| ID | Date (Days before surgery) | Fee item | Description         | Diagnosis | Provider | Specialty |
|----|----------------------------|----------|---------------------|-----------|----------|-----------|
| 1  | 2020-02-24 (8)             | 441      | Neurology consult   | 435       | 104      | Neurology |
| 1  | 2020-02-28 (4)             | 442      | Neurology follow up | 434       | 104      | Neurology |
| 1  | 2020-02-28 (4)             | 442      | Neurology follow up | 434       | 105      | Neurology |

**Step 1 - Clustering.** The claims database offers two types of data that might be relevant to classification - diagnoses and services. We can apply conceptually meaningful clusters to reduce the number of categories. With reference to our sample data, we have defined a set of diagnosis \* specialty and a set of fee item clusters for neurology.

| Cluster (dx)     | Diagnosis | Specialty |
|------------------|-----------|-----------|
| d_tia_neuro      | 435       | Neurology |
| d_stroke_neuro   | 434       | Neurology |
| d_stenosis_neuro | 433       | Neurology |

| Cluster (fee)     | Fee item |
|-------------------|----------|
| f_neurology_visit | 441      |
| f_neurology_visit | 442      |
| f_neurology_visit | 443      |

**Step 2 - Reduce.** After clustering, reduction can be applied to remove conceptual duplicates, such as visits to the same provider, or visits on the same day. With reference to our sample data, if we were to reduce diagnosis by provider number, we would keep only the most recent row for provider 104. If we were to reduce fee items by service date, we would discard one of the two neurology visits from 2020-02-28 (arbitrarily, we keep the last row from the set).

| ID | Days before | Cluster (dx)   | Provider |
|----|-------------|----------------|----------|
| 1  | 8           | d_tia_neuro    | 104      |
| 1  | 4           | d_stroke_neuro | 104      |
| 1  | 4           | d_stroke_neuro | 105      |

| ID | Days before | Cluster (fee)     | Provider |
|----|-------------|-------------------|----------|
| 1  | 8           | f_neurology_visit | 104      |
| 1  | 4           | f_neurology_visit | 104      |
| 1  | 4           | f_neurology_visit | 105      |

**Step 3 - Weight.** Services that are closer in time to the surgery date might be more predictive than remote services. We can define weight functions, like a linear decay, to capture this. With reference to our sample data, we have applied a 1% per day linear decay to diagnosis and a simple threshold for fee items. All weights are defined to return values between 0 and 1.

| ID | Weight | Cluster (dx)   | Provider |
|----|--------|----------------|----------|
| 1  | 0.96   | d_stroke_neuro | 104      |
| 1  | 0.96   | d_stroke_neuro | 105      |

| ID | Weight | Cluster (fee)     | Provider |
|----|--------|-------------------|----------|
| 1  | 1      | f_neurology_visit | 104      |
| 1  | 1      | f_neurology_visit | 105      |

**Step 4 - Summarize.** Finally, a summarizing function needs to be applied to reduce feature tables to a single row per participant. For our sample data we have used a max value for diagnosis and a sum for fee items. This is combined with a pivot operation to create one row per participant.

| ID | d_stroke_neuro | f_neurology_visit |
|----|----------------|-------------------|
| 1  | 0.96 (max)     | 2 (sum)           |

Supplementary Figure 2. Feature extraction for physician claims data, illustrating clustering, reduction, weighting, and summarizing functions applied to sample data.

## SUPPLEMENTAL REFERENCES

References 1-44 are included in the main manuscript.

45. Romano P, Roos LL, Jollis JG. Adapting a clinical comorbidity index for use with ICD-9-CM administrative data: differing perspectives. *J Clin Epidemiol.* 1993;46:1075–9.
